# Supplementary material
Source: publisher figshare collection journal article supplement (https://karger.figshare.com/articles/dataset/_/5124508)
Supplement: Supplementary file 1 [file 1 › hallo.txt]

hallo test
